# Supplementary material
Source: publisher figshare collection journal article supplement (https://frontiersin.figshare.com/ndownloader/files/20178110)
Supplement: Supplementary file 1 [file 20178110]

S1: Supplementary Material 1: A PRISMA **flow diagram** depicting the **flow** of information through the different phases of our systematic review.
